# Supplementary material for: Pseudo isobaric peptide termini labelling for relative proteome quantification by SWATH MS acquisition
Source: Royal Society of Chemistry journal article supplement (doi:10.1039/c6an00388e), 2016-01-01
Supplement: c6an00388e1.pdf [file c6an00388e1.pdf]

# Supporting Information for

## Pseudo Isobaric Peptide Termini Labeling for Relative Proteome

### Quantification by SWATH MS Acquisition

Shen Zhang, Lingfan Chen, Yichu Shan, Zhigang Sui, Qi Wu, Lihua Zhang\*,  
Zhen Liang and Yukui Zhang

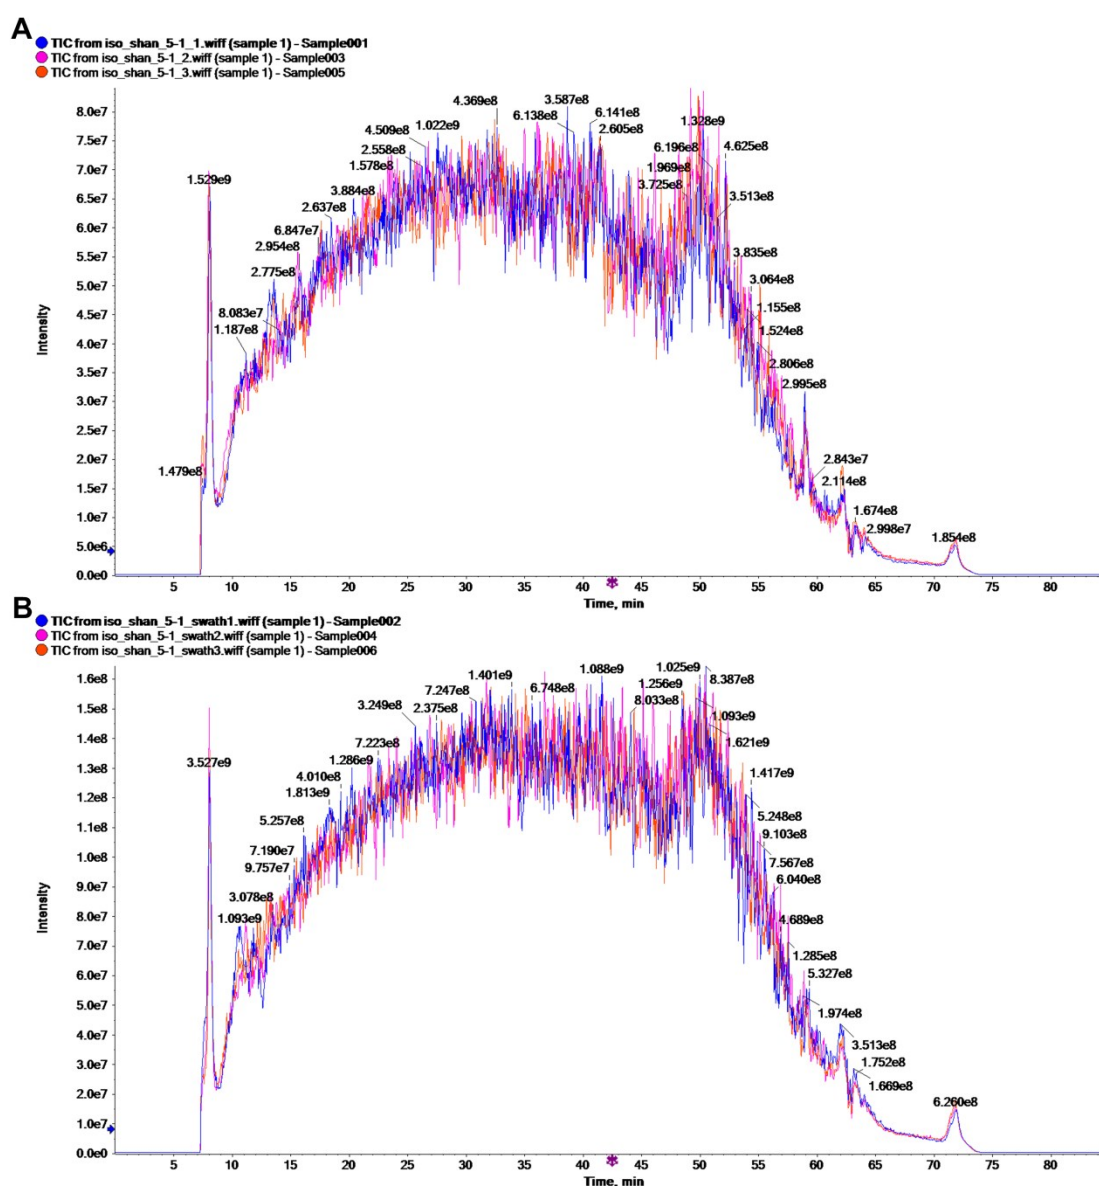

**Figure S1.** The TIC intensity graphs of three DDA-pseudo-IPTL replicates (A) and three SWATH-pseudo-IPTL replicates (B).

**Table S1.** The mean, average relative error (RE) and average relative standard deviation (RSD) of DDA-pseudo-IPTL and SWATH-pseudo-IPTL.

| Expected value | Mean of DDA-pseudo-IPTL | Mean of SWATH-pseudo-IPTL | RE of DDA-pseudo-IPTL | RE of SWATH - pseudo-IPTL | RSD of DDA-pseudo-IPTL | RSD of SWATH-pseudo-IPTL |
|----------------|-------------------------|---------------------------|-----------------------|---------------------------|------------------------|--------------------------|
| 0.1            | 0.120                   | 0.107                     | 23.1%                 | 9.3%                      | 18.4%                  | 6.4%                     |
| 0.2            | 0.250                   | 0.232                     | 24.5%                 | 9.8%                      | 21.4%                  | 6.3%                     |
| 1              | 0.975                   | 1.076                     | 21.4%                 | 12.5%                     | 18.7%                  | 11.5%                    |
| 5              | 4.672                   | 5.010                     | 25.7%                 | 16.9%                     | 18.0%                  | 12.0%                    |
| 10             | 8.702                   | 10.161                    | 31.2%                 | 18.2%                     | 22.4%                  | 10.8%                    |
