# Supplementary material for: Pseudo isobaric peptide termini labelling for relative proteome quantification by SWATH MS acquisition
Source: Royal Society of Chemistry journal article supplement (doi:10.1039/c6an00388e), 2016-01-01
Supplement: c6an00388e2.xlsx [file c6an00388e2.xlsx]

## Sheet: Sheet1
Table S2 The differential expressed proteins in human-HCC-H/L cell lins
IPI accession number	Protein name	Gene Number	Uniprot website link	Log ratio
IPI00789281	Isoform 3 of Protein virilizer homolog	KIAA1429	http://www.uniprot.org/uniprot/Q69YN4	-2.21365
IPI00479185	tropomyosin alpha-3 chain isoform 4	TPM3	http://www.uniprot.org/uniprot/P06753	-2.1224
IPI00166931	Isoform 1 of Protein prune homolog	PRUNE	http://www.uniprot.org/uniprot/Q86TP1	-2.02823
IPI00978400	Uncharacterized protein	ADAR	http://www.uniprot.org/uniprot/P55265	-1.9371
IPI00028083	Translation initiation factor eIF-2B subunit beta	EIF2B2	http://www.uniprot.org/uniprot/P49770	-1.81846
IPI00646055	Uncharacterized protein	TRAP1	http://www.uniprot.org/uniprot/Q12931	-1.80706
IPI00219622	Proteasome subunit alpha type-2	PSMA2	http://www.uniprot.org/uniprot/P25787	-1.74696
IPI00220306	Isoform 4 of Mitogen-activated protein kinase 8	MAPK8	http://www.uniprot.org/uniprot/P45983	-1.69167
IPI00941811	Ubiquitin carboxyl-terminal hydrolase	USP8	http://www.uniprot.org/uniprot/P40818	-1.68837
IPI00024971	Oxysterol-binding protein 1	OSBP	http://www.uniprot.org/uniprot/P22059	-1.64874
IPI00908400	cDNA, FLJ78814, highly similar to F-actin capping protein alpha-2 subunit	CAPZA2	http://www.uniprot.org/uniprot/P47755	-1.6327
IPI01021216	Uncharacterized protein	PCBP2	http://www.uniprot.org/uniprot/B4DXP5	-1.58951
IPI00797574	Biorientation of chromosomes in cell division protein 1-like	BOD1L	http://www.uniprot.org/uniprot/Q8NFC6	-1.54702
IPI00983068	Isoform 1 of Thioredoxin reductase 1, cytoplasmic	TXNRD1	http://www.uniprot.org/uniprot/Q16881	-1.53246
IPI01013681	Uncharacterized protein	SMARCA5	http://www.uniprot.org/uniprot/O60264	-1.38765
IPI00956559	eukaryotic translation initiation factor 4 gamma 1 isoform 6	EIF4G1	http://www.uniprot.org/uniprot/Q04637	-1.36711
IPI00470416	Isoform 2 of Poly(A) RNA polymerase, mitochondrial	MTPAP	http://www.uniprot.org/uniprot/Q9NVV4	-1.32878
IPI00307162	Isoform 2 of Vinculin	VCL	http://www.uniprot.org/uniprot/P18206	-1.30843
IPI00028481	Ras-related protein Rab-8A	RAB8A	http://www.uniprot.org/uniprot/P61006	-1.30803
IPI00941711	Uncharacterized protein	MYO6	http://www.uniprot.org/uniprot/Q9UM54	-1.30533
IPI00291939	Structural maintenance of chromosomes protein 1A	SMC1A	http://www.uniprot.org/uniprot/Q14683	-1.28894
IPI00294879	Ran GTPase-activating protein 1	RANGAP1	http://www.uniprot.org/uniprot/P46060	-1.25237
IPI00969501	Isoform 8 of Treacle protein	TCOF1	http://www.uniprot.org/uniprot/Q13428	-1.21202
IPI00294158	Biliverdin reductase A	BLVRA	http://www.uniprot.org/uniprot/P53004	-1.20209
IPI01026287	16 kDa protein	NPC2	http://www.uniprot.org/uniprot/P61916	-1.16007
IPI00873093	Isoform A of Inositol polyphosphate 5-phosphatase OCRL-1	OCRL	http://www.uniprot.org/uniprot/Q01968	-1.14006
IPI00220487	Isoform 1 of ATP synthase subunit d, mitochondrial	ATP5H	http://www.uniprot.org/uniprot/O75947	-1.11761
IPI00852644	Protein FAM127B	FAM127B	http://www.uniprot.org/uniprot/?query=FAM127B&sort=score	-1.1136
IPI00232806	Isoform 2 of Structural maintenance of chromosomes protein 2	SMC2	http://www.uniprot.org/uniprot/O95347	-1.08856
IPI00872780	cDNA FLJ51794, highly similar to Annexin A4	ANXA4	http://www.uniprot.org/uniprot/P09525	-0.978149
IPI00873210	Uncharacterized protein	FN1	http://www.uniprot.org/uniprot/P02751	-0.951672
IPI00296441	Adenosine deaminase	ADA	http://www.uniprot.org/uniprot/P00813	-0.940081
IPI00607820	Isoform 2 of H/ACA ribonucleoprotein complex subunit 1	GAR1	http://www.uniprot.org/uniprot/Q9NY12	-0.922012
IPI00219865	Isoform 2 of Diablo homolog, mitochondrial	DIABLO	http://www.uniprot.org/uniprot/Q9NR28	-0.912319
IPI00785023	Isoform 2 of Serine/arginine repetitive matrix protein 2	SRRM2	http://www.uniprot.org/uniprot/I3L1I8	-0.847533
IPI00607771	Isoform 2 of Signal transducing adapter molecule 2	STAM2	http://www.uniprot.org/uniprot/O75886	-0.842923
IPI00028931	Desmoglein-2	DSG2	http://www.uniprot.org/uniprot/Q14126	-0.841247
IPI00217519	Ras-related protein Ral-A	RALA	http://www.uniprot.org/uniprot/P11233	-0.831089
IPI00306749	Kanadaptin	SLC4A1AP	http://www.uniprot.org/uniprot/Q9BWU0	-0.786322
IPI00299214	Thymidine kinase, cytosolic	TK1	http://www.uniprot.org/uniprot/P04183	-0.753683
IPI00922694	Uncharacterized protein	HSPA9	http://www.uniprot.org/uniprot/P38646	-0.749269
IPI00029114	Peptidyl-tRNA hydrolase ICT1, mitochondrial	ICT1	http://www.uniprot.org/uniprot/Q14197	-0.741913
IPI00556027	Isoform 2 of BAG family molecular chaperone regulator 5	BAG5	http://www.uniprot.org/uniprot/Q9UL15	-0.735775
IPI00893062	X-ray repair complementing defective repair in Chinese hamster cells 6	XRCC6	http://www.uniprot.org/uniprot/P12956	-0.703147
IPI00021175	Isoform 1 of Cyclin-dependent kinase 12	CDK12	http://www.uniprot.org/uniprot/Q9NYV4	-0.702286
IPI00796533	cDNA FLJ57793, moderately similar to Mannose-P-dolichol utilization defect 1 protein	MPDU1	http://www.uniprot.org/uniprot/O75352	-0.70192
IPI00020416	Tripeptidyl-peptidase 2	TPP2	http://www.uniprot.org/uniprot/P29144	-0.697998
IPI00220998	Isoform II2 of Myc box-dependent-interacting protein 1	BIN1	http://www.uniprot.org/uniprot/O00499	-0.696785
IPI00556444	Uncharacterized protein (Fragment)	RABGGTB	http://www.uniprot.org/uniprot/P53611	-0.646797
IPI01011191	cDNA FLJ59681, highly similar to Plastin-3	PLS3	http://www.uniprot.org/uniprot/P13797	-0.639507
IPI00909453	cDNA FLJ52243, highly similar to Heat-shock protein beta-1	HSPB1	http://www.uniprot.org/uniprot/P04792	-0.635919
IPI01011496	Uncharacterized protein	TPD52	http://www.uniprot.org/uniprot/P55327	-0.628565
IPI00477231	Bifunctional protein NCOAT	MGEA5	http://www.uniprot.org/uniprot/O60502	-0.599021
IPI00647400	Uncharacterized protein	RNPEP	http://www.uniprot.org/uniprot/Q9HAU8	-0.543323
IPI00788879	Isoform 1 of TBC1 domain family member 23	TBC1D23	http://www.uniprot.org/uniprot/Q9NUY8	-0.54235
IPI00549239	Pseudouridylate synthase 7 homolog-like protein	PUS7L	http://www.uniprot.org/uniprot/Q9H0K6	-0.534104
IPI00843886	20 kDa protein	APOO	http://www.uniprot.org/uniprot/Q9BUR5	-0.529464
IPI00975562	Uncharacterized protein	CHCHD6	http://www.uniprot.org/uniprot/Q9BRQ6	-0.500252
IPI00239077	Histidine triad nucleotide-binding protein 1	HINT1	http://www.uniprot.org/uniprot/P49773	-0.495038
IPI00908696	Uncharacterized protein	ARL6IP5	http://www.uniprot.org/uniprot/O75915	-0.483191
IPI00375127	Similar to mKIAA0038 protein	EIF4H	http://www.uniprot.org/uniprot/Q15056	-0.472904
IPI00009634	Sulfide:quinone oxidoreductase, mitochondrial	SQRDL	http://www.uniprot.org/uniprot/Q9Y6N5	-0.463753
IPI00797126	Uncharacterized protein	NACA	http://www.uniprot.org/uniprot/Q13765	-0.458951
IPI00337541	NAD(P) transhydrogenase, mitochondrial	NNT	http://www.uniprot.org/uniprot/Q13423	-0.457813
IPI00922443	cDNA FLJ59210, highly similar to Tubulin-specific chaperone E	TBCE	http://www.uniprot.org/uniprot/Q15813	-0.444434
IPI00306056	Ribonuclease P protein subunit p25	RPP25	http://www.uniprot.org/uniprot/Q9BUL9	-0.442865
IPI00006250	Isoform 1 of Short-chain dehydrogenase/reductase 3	DHRS3	http://www.uniprot.org/uniprot/O75911	-0.44193
IPI00942120	Serine/threonine-protein kinase 3	STK3	http://www.uniprot.org/uniprot/Q13188	-0.438817
IPI00020567	Rho GTPase-activating protein 1	ARHGAP1	http://www.uniprot.org/uniprot/Q07960	-0.412104
IPI00383046	Carboxymethylenebutenolidase homolog	CMBL	http://www.uniprot.org/uniprot/Q96DG6	-0.410753
IPI00307155	Rho-associated protein kinase 2	ROCK2	http://www.uniprot.org/uniprot/O75116	-0.403538
IPI00448798	Isoform 2 of Casein kinase I isoform alpha	CSNK1A1	http://www.uniprot.org/uniprot/P48729	-0.397007
IPI00550928	Isoform 2 of Enoyl-CoA hydratase domain-containing protein 1	ECHDC1	http://www.uniprot.org/uniprot/Q9NTX5	-0.395594
IPI00845271	Isoform 2 of EH domain-binding protein 1	EHBP1	http://www.uniprot.org/uniprot/Q8NDI1	-0.394076
IPI00024167	ESF1 homolog	ESF1	http://www.uniprot.org/uniprot/Q9H501	-0.389148
IPI01011408	cDNA FLJ16235 fis, clone FEBRA2028516	RRP12	http://www.uniprot.org/uniprot/Q5JTH9	-0.377499
IPI00555614	Putative heat shock protein HSP 90-beta-3	HSP90AB3P	http://www.uniprot.org/uniprot/Q58FF7	-0.374687
IPI00465294	Cell division cycle 5-like protein	CDC5L	http://www.uniprot.org/uniprot/Q99459	-0.372588
IPI00853161	60S ribosomal protein L10	SNORA70		-0.369019
IPI00645138	cDNA FLJ55652, highly similar to Nucleolar GTP-binding protein 1	GTPBP4	http://www.uniprot.org/uniprot/Q9BZE4	-0.366075
IPI00783378	Ubiquitin-conjugating enzyme E2 O	UBE2O	http://www.uniprot.org/uniprot/K7ES11	-0.363894
IPI00445401	Isoform 2 of E3 ubiquitin-protein ligase HUWE1	HUWE1	http://www.uniprot.org/uniprot/Q7Z6Z7	-0.358323
IPI00877635	Ribosomal protein L3, isoform CRA_b	SNORD43		-0.355274
IPI00386189	Isoform 1 of N-alpha-acetyltransferase 15, NatA auxiliary subunit	NAA15	http://www.uniprot.org/uniprot/Q9BXJ9	-0.355132
IPI01022048	Uncharacterized protein	PA2G4	http://www.uniprot.org/uniprot/Q9UQ80	-0.352944
IPI00829908	Isoform 2 of U2 snRNP-associated SURP motif-containing protein	U2SURP	http://www.uniprot.org/uniprot/O15042	-0.35252
IPI01015591	Uncharacterized protein	DHX15	http://www.uniprot.org/uniprot/O43143	-0.346056
IPI01014215	Uncharacterized protein	OTUB1	http://www.uniprot.org/uniprot/Q96FW1	0.345146
IPI00220336	Isoform 2 of Exosome component 10	EXOSC10	http://www.uniprot.org/uniprot/Q01780	0.348141
IPI01023024	Isoform Alpha of LIM domain and actin-binding protein 1	LIMA1	http://www.uniprot.org/uniprot/Q9UHB6	0.348337
IPI01015990	Uncharacterized protein	SEPT7	http://www.uniprot.org/uniprot/Q16181	0.355488
IPI00157790	proteasome-associated protein ECM29 homolog	KIAA0368	http://www.uniprot.org/uniprot/Q5VYK3	0.358809
IPI01015489	cDNA FLJ60345, highly similar to Protein transport protein Sec24C	SEC24C	http://www.uniprot.org/uniprot/P53992	0.36151
IPI01014788	Uncharacterized protein	RAB2A	http://www.uniprot.org/uniprot/P61019	0.362932
IPI00794240	Uncharacterized protein	MRPL39	http://www.uniprot.org/uniprot/Q9NYK5	0.366707
IPI00646415	20 kDa protein	RAB14	http://www.uniprot.org/uniprot/P61106	0.369174
IPI01013700	cDNA FLJ61200, highly similar to Homo sapiens hydroxysteroid dehydrogenase like 2 (HSDL2), mRNA	HSDL2	http://www.uniprot.org/uniprot/Q6YN16	0.37128
IPI00221012	Isoform 1 of Probable ubiquitin carboxyl-terminal hydrolase FAF-X	USP9X	http://www.uniprot.org/uniprot/Q93008	0.371663
IPI00976039	Uncharacterized protein	NUCB2	http://www.uniprot.org/uniprot/P80303	0.374679
IPI00922336	cDNA FLJ55712, highly similar to F-box-like/WD repeat protein TBL1XR1	TBL1XR1	http://www.uniprot.org/uniprot/Q9BZK7	0.381005
IPI00965597	Uncharacterized protein	DBN1	http://www.uniprot.org/uniprot/Q16643	0.381228
IPI00967499	Uncharacterized protein	LYRM7	http://www.uniprot.org/uniprot/Q5U5X0	0.381995
IPI00910979	pyruvate kinase isozymes M1/M2 isoform e	PKM2	http://www.uniprot.org/uniprot/P14618	0.384656
IPI00032879	Isoform 1 of Adenylate kinase isoenzyme 6	TAF9	http://www.uniprot.org/uniprot/Q16594	0.390684
IPI00306332	60S ribosomal protein L24	RPL24	http://www.uniprot.org/uniprot/P83731	0.390723
IPI00742124	UBX domain-containing protein 7	UBXN7	http://www.uniprot.org/uniprot/O94888	0.395104
IPI00010153	60S ribosomal protein L23	RPL23	http://www.uniprot.org/uniprot/P62829	0.395273
IPI00063729	THO complex subunit 3	THOC3	http://www.uniprot.org/uniprot/Q96J01	0.400072
IPI00792218	proteasome subunit alpha type-4 isoform 2	PSMA4	http://www.uniprot.org/uniprot/P25789	0.406119
IPI01022651	Isoform 1 of Eukaryotic translation initiation factor 4 gamma 2	EIF4G2	http://www.uniprot.org/uniprot/P78344	0.416809
IPI00217113	Isoform 3 of CAP-Gly domain-containing linker protein 1	CLIP1	http://www.uniprot.org/uniprot/P30622	0.41847
IPI00873577	110 kDa protein	KIF23	http://www.uniprot.org/uniprot/Q02241	0.438999
IPI00843876	Isoform 2 of Transportin-1	TNPO1	http://www.uniprot.org/uniprot/Q92973	0.440065
IPI00409684	Isoform 2 of Nck-associated protein 1	NCKAP1	http://www.uniprot.org/uniprot/Q9Y2A7	0.445517
IPI00953236	glutathione reductase, mitochondrial isoform 2 precursor	GSR	http://www.uniprot.org/uniprot/P00390	0.457335
IPI00642238	Isoform 1 of Heterochromatin protein 1-binding protein 3	HP1BP3	http://www.uniprot.org/uniprot/Q5SSJ5	0.472554
IPI00925297	cDNA FLJ55839, highly similar to Bcl-2-like 13 protein	BCL2L13	http://www.uniprot.org/uniprot/Q9BXK5	0.474702
IPI00939370	CKAP4 protein (Fragment)	CKAP4	http://www.uniprot.org/uniprot/Q07065	0.517767
IPI00867627	Isoform 2 of A-kinase anchor protein 12	AKAP12	http://www.uniprot.org/uniprot/Q02952	0.526441
IPI00479209	cDNA FLJ54590, highly similar to KH domain-containing, RNA-binding, signaltransduction-associated protein 1	KHDRBS1	http://www.uniprot.org/uniprot/Q07666	0.526868
IPI00945908	Omega-amidase NIT2	NIT2	http://www.uniprot.org/uniprot/Q9NQR4	0.527242
IPI01010794	THO complex subunit 4	THOC4	http://www.uniprot.org/uniprot/Q86V81	0.548943
IPI00647507	Uncharacterized protein	FKBP1A	http://www.uniprot.org/uniprot/P62942	0.611112
IPI00005740	Neighbor of COX4	COX4NB	http://www.uniprot.org/uniprot/O43402	0.669333
IPI00219037	Histone H2A.x	H2AFX	http://www.uniprot.org/uniprot/P16104	0.770091
IPI00396485	Elongation factor 1-alpha 1	EEF1A1	http://www.uniprot.org/uniprot/P68104	0.775997
IPI00619921	Isoform 4 of Death-inducer obliterator 1	DIDO1	http://www.uniprot.org/uniprot/Q9BTC0	0.777088
IPI00032038	Isoform 1 of Carnitine O-palmitoyltransferase 1, liver isoform	CPT1A	http://www.uniprot.org/uniprot/P50416	0.813598
